# Supplementary material
Source: PubMed Central journal article supplement (PMC2951417)
Supplement: 1007032107_pnas.201007032SI.pdf [file 1007032107_pnas.201007032SI.pdf]

# Supporting Information

Fujimoto et al. 10.1073/pnas.1007032107

## SI Materials and Methods

**Molecular Cloning of *dnd*, *vasa*, *dmrt1*, *foxl2*, and *p450arom*.** Unfertilized eggs were used to clone *dnd* and *vasa*, testes for *dmrt1*, and ovaries for *foxl2* and *p450arom*. Poly(A) RNA was extracted from unfertilized eggs and ovaries using QuickPrep micro mRNA purification kit (GE Healthcare), and total RNA was extracted from testes using NucleoSpin RNA II kit (Macherey-Nagel) according to the manufacturer's instructions. 3'-RACE cDNA and 5'-RACE cDNA were produced with 1 µg poly(A) RNA and total RNA using the SMART RACE cDNA amplification kit (Clontech) according to the manufacturer's instructions. PCR amplification of each gene was performed using the 3'-RACE cDNA as the template and the degenerate primer sets listed in Table S4. The DNA fragments from each PCR were cloned using the TOPO TA cloning kit for sequencing (Invitrogen) and eight clones from each gene were amplified by PCR using the following vector-specific primers: M13 forward (−20), 5'-GTAAAACGACGGCCA-3' and M13 reverse, 5'-CAGGAA-ACAGCTATGAC-3'. Subsequently, partial DNA sequences of each gene were determined by the dideoxy chain termination method using BigDye Terminator v3.1 cycle sequencing kits (Applied Biosystems) and bidirectional sequencing on a DNA analyzer 3130xl (Applied Biosystems). Using the information obtained from partial sequencing, 5'- and 3'-RACE were then performed according to the manufacturer's instructions.

**Sequence Information of *dnd*, *vasa*, *dmrt1*, *foxl2*, and *p450arom*.** A 2,741-bp *vasa* cDNA was isolated; this had an ORF of 1932 bp encoding a putative 644-aa protein with characteristic 215-aa DEAD-box helicases and a 130-aa helicase superfamily C-terminal domain (AB531493). It was similar to *Vasa* orthologs of zebrafish (86%, NP\_571132.1), goldfish (75%, AAX22125.1), tilapia (76%, BAB19807.1), and medaka (74%, NP\_001098146.1).

A 1671-bp *dnd* cDNA was isolated; this had an ORF of 1116 bp encoding a putative 372-aa protein containing a 74-aa RNA

recognition motif (AB531494). It was similar to Dead end orthologs of zebrafish (57%, NP\_998960.1), rainbow trout (47%, NP\_001118133.1), and medaka (46%, NP\_001157988.1).

A 639-bp partial sequence of *dmrt1* was obtained (AB531495). This partial sequence encoded a putative 188-aa protein and had 93% homology to the ortholog of large-scale loach (*Paramisgurnus dabryanus*) (ABK88911). The DM domain was not included in the fragment.

A 1,555-bp *foxl2* cDNA was isolated; this had an ORF of 882 bp encoding a putative 294-aa protein with a characteristic 111-aa forkhead domain (AB531497). It was similar to *Foxl2* orthologs in zebrafish (79%, NP\_001038717), tilapia (76%, AAT36328), medaka (76%, NP\_001098358), and rainbow trout (76%, AAS87040).

A partial *p450arom* cDNA of 1861 bp was isolated; this had an ORF of 1572 bp encoding a putative 524-aa protein (AB531496). It was similar to *P450arom* orthologs in the common carp (80%, ACB13197), zebrafish (79%, AAK00643), goldfish (79%, AAC14013), and wrasse (69%, AAR37048). The aromatase also contained conserved regions: helical region, Ozol's peptide, aromatic region, and heme-binding region.

**RT-PCR Analysis.** Gonads were dissected from 2-y-old wild-type and *dnd* morphants and used for extraction of total RNA by a NucleoSpin RNA II kit (Macherey-Nagel). Each tissue sample included a gonad from a single fish. Three hundred nanograms of total RNA was reverse-transcribed by PrimeScript RTase (Takara) to synthesize cDNA. RT-PCR primers are shown in Table S4. PCR conditions were as follows: 94 °C (1 min), then 30 cycles of 94 °C (30 s), 60 °C (30 s), 72 °C (45 s), and ending with a 5-min extension phase at 72 °C. PCR products were electrophoresed on a 1.2% agarose gel and visualized after ethidium bromide staining using a UV-transilluminator. RT-PCR was performed using two independent samples from each gonadal type.



**Table S4. Sequences of primers used in the present study**

| Primer                | Purpose         | Sequence (5'–3')                           |
|-----------------------|-----------------|--------------------------------------------|
| dead end-degenerate-F | Partial cloning | ACGGCGGCCCTCC(GATC)CC(GATC)GG(GATC)TGG     |
| dead end-degenerate-R | Partial cloning | CCGGTCGATGTA(TTGGC)AG(TA)(GATC)GC(AG)AA    |
| dead end-5' RACE-R1   | RACE cloning    | TCCGGTCGATGTA(TTGGC)AGGCGA                 |
| dead end-5' RACE-R2   | RACE cloning    | CTGGAAGAGCGGGATTAGGGGTGTCCTCA              |
| dead end-3' RACE-F1   | RACE cloning    | CTGCTACAGCTTTTCAACCCGAGGCAC                |
| dead end-3' RACE-F2   | RACE cloning    | TCCCGTCTTCCAGAGAGTCGGCA                    |
| vasa-degenerate-F     | Partial cloning | GGACGAGACCTGATGGCTTG(CT)GC(GATC)CA(AG)AC   |
| vasa-degenerate-R     | Partial cloning | TGTTTCGTCGATTCCGGTG(GATC)AC(AG)TA(GATC)TC  |
| vasa-5' RACE-R        | RACE cloning    | GTGCGTTCATTTCTGTGGTTCTC                    |
| vasa-3' RACE-F        | RACE cloning    | GGTGGTTTATGGCGGGACAACACTGGA                |
| vasa-RT-F             | RT-PCR          | CTGAACCTGCCATGGATGAC                       |
| vasa-RT-R             | RT-PCR          | CTTCACCTCCTTTATAACCTCAC                    |
| dmrt1-degenerate-F    | Partial cloning | CGACGACAGCAGGCTCA(AG)GA(AG)GA(AG)GA        |
| dmrt1-degenerate-R    | Partial cloning | CGGTA(TTGGC)AG(AG)GACA(CT)GTTGTGG          |
| dmrt1-3' RACE-F1      | RACE cloning    | GAGGAGATGGGCATCTGCAATCCA                   |
| dmrt1-3' RACE-F2      | RACE cloning    | AGCTCCATCACCCACCACCAAGT                    |
| dmrt1-3' RACE-F3      | RACE cloning    | TGAAAGCAGCTCAGAGTCCGGCACCTT                |
| dmrt1-RT-F            | RT-PCR          | GAGATGGGCATCTGCAATCC                       |
| dmrt1-RT-R            | RT-PCR          | GCTGCTTTCACACTCCAGTC                       |
| foxl2-degenerate-F    | Partial cloning | CCCTTTCTACGAGAAGAACAAGAA(AG)GG(GATC)TGCGCA |
| foxl2-degenerate-R    | Partial cloning | AGGCTGTCCGGGAGCA(GATC)GC(AG)AA(CT)TG       |
| foxl2-5' RACE-R1      | RACE cloning    | GCGCTGTTGGACGGTACCGGTGAG                   |
| foxl2-5' RACE-R2      | RACE cloning    | GGAGCCGAGAGGTAGCTGCCGTATCC                 |
| foxl2-3' RACE-F1      | RACE cloning    | GGATGAAGCGCCGTTTCCAGACCGTCA                |
| foxl2-3' RACE-F2      | RACE cloning    | AACGGCATGGGTACCATCAGCACC                   |
| foxl2-3' RACE-F3      | RACE cloning    | TGTCTGAGGTTTACCCGGTAGTGGA                  |
| foxl2-RT-F            | RT-PCR          | AAGCCCGCGTACTCTTATGTGG                     |
| foxl2-RT-R            | RT-PCR          | TCCCATTTGACAGGACGCGTAG                     |
| p450arom-degenerate-F | Partial cloning | ACATCGTGCGAGTGTGGAT(AT)AA(CT)GG            |
| p450arom-degenerate-R | Partial cloning | GCTCGAGGTCCGCATCC(AG)AA(GATC)GG(CT)TG      |
| p450arom-5' RACE-R1   | RACE cloning    | TCTGGACCAGCGATCACCATCTCC                   |
| p450arom-5' RACE-R2   | RACE cloning    | GGCGTCTGCAACTCCTGAGCTTCT                   |
| p450arom-3' RACE-F1   | RACE cloning    | TCGGGATGCATGAACAGGGCATT                    |
| p450arom-3' RACE-F2   | RACE cloning    | CAGTTCACCGATAGCCAGCGACAGG                  |
| p450arom-3' RACE-F3   | RACE cloning    | GGAAATGTTAACGACGTGACATCGGAGTG              |
| p450arom-RT-F         | RT-PCR          | CTGCAGGGAGTCACAGCTAC                       |
| p450arom-RT-R         | RT-PCR          | CAGTTCTGCAGCGAAGTCAAG                      |
| $\beta$ -Actin-RT-F   | RT-PCR          | TTACCCACACCGTGCCCATCTAC                    |
| $\beta$ -Actin-RT-R   | RT-PCR          | TACCGCAAGACTCCATACCCA                      |
